# Supplementary material for: Rhesus Theta Defensin 1 Promotes Long Term Survival in Systemic Candidiasis by Host Directed Mechanisms
Source: PubMed Central journal article supplement (PMC6858451; doi:10.1038/s41598-019-53402-z), 2019-11-15
Supplement: 41598_2019_53402_MOESM1_ESM.pdf [file 41598_2019_53402_MOESM1_ESM.pdf]

**Rhesus Theta Defensin 1 Promotes Long Term Survival in Systemic Candidiasis by Host  
Directed Mechanisms**

Virginia Basso<sup>1</sup>, Dat Q. Tran<sup>1,2</sup>, Justin B. Schaal<sup>1</sup>, Patti Tran<sup>1</sup>, Yoshihiro Eriguchi<sup>1</sup>, Diana Ngole<sup>1</sup>,  
Anthony E. Cabebe<sup>1</sup>, A young Park<sup>3</sup>, Paul M. Beringer<sup>3</sup>, André J. Ouellette<sup>1,4</sup>, and Michael E.  
Selsted<sup>\*1,2,4</sup>

<sup>1</sup>Department of Pathology and Laboratory Medicine, Keck School of Medicine, University of  
Southern California, Los Angeles, California, United States of America

<sup>2</sup>Oryn Therapeutics, Vacaville, California, United States of America

<sup>3</sup>Department of Clinical Pharmacy, School of Pharmacy, University of Southern California, Los  
Angeles, United States of America

<sup>4</sup>Norris Comprehensive Cancer Center of the University of Southern California, Los Angeles  
California, United States of America

\*Address correspondence to Michael E. Selsted, [selsted@med.usc.edu](mailto:selsted@med.usc.edu)

Suppl. Fig. 1

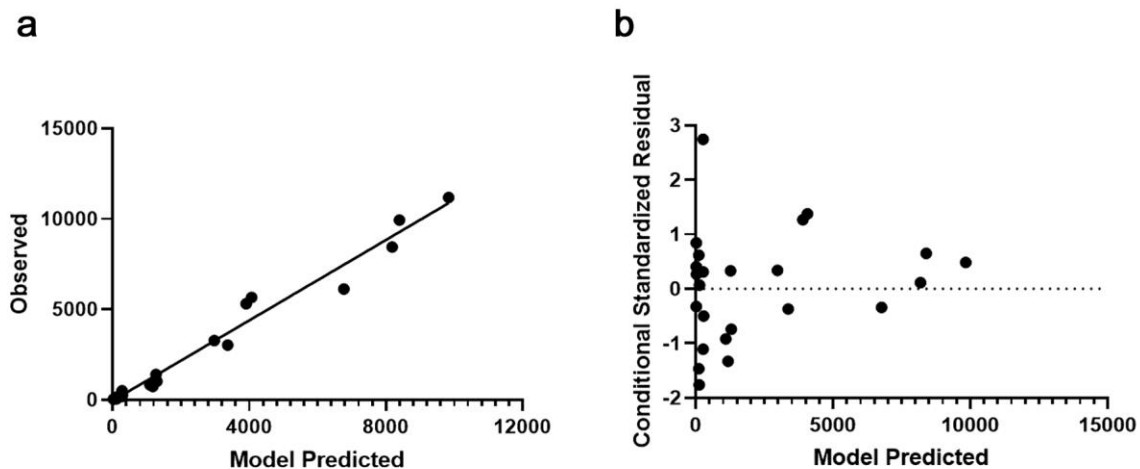

Suppl. Figure 1. Goodness-of-fit plots of the final PK model. (a) Observed RTD-1 concentrations versus model predicted concentrations following i.v. injection ( $R^2 = 0.9774$ ; slope  $\pm$  SE = 1.111-61.04) using linear regression, and (b) conditional standardized residuals versus model prediction.

Suppl. Table 1. Log-rank analysis for Fig. 3.

|            | RTD-1 i.p.           | RTD-1 s.c.           | RTD-1 i.v.           | Caspo                | Fluco                |
|------------|----------------------|----------------------|----------------------|----------------------|----------------------|
| Saline     | $3.3 \times 10^{-7}$ | $1.5 \times 10^{-5}$ | $6.9 \times 10^{-4}$ | $4.3 \times 10^{-7}$ | $4.3 \times 10^{-7}$ |
| RTD-1 i.p. | -                    | ns                   | ns                   | 0.019                | ns                   |
| RTD-1 s.c. | -                    | -                    | ns                   | $3.1 \times 10^{-3}$ | ns                   |
| RTD-1 i.v. | -                    | -                    | -                    | $5.7 \times 10^{-3}$ | ns                   |
| Caspo      | -                    | -                    | -                    | -                    | 0.014                |

a. RTD-1 efficacy is independent of route of peptide administration.

b. RTD-1 efficacy *in vivo* is dose-dependent.

|           | 20 mg/kg             | 10 mg/kg             | 5 mg/kg              | 2.5 mg/kg            | 0.5 mg/kg            | 0.25 mg/kg           |
|-----------|----------------------|----------------------|----------------------|----------------------|----------------------|----------------------|
| Saline    | $6.3 \times 10^{-5}$ | 0.013                | $3.3 \times 10^{-7}$ | $1.5 \times 10^{-6}$ | $1.5 \times 10^{-4}$ | $4.0 \times 10^{-5}$ |
| 20 mg/kg  | -                    | $6.3 \times 10^{-5}$ | $3.7 \times 10^{-5}$ | $6.3 \times 10^{-5}$ | $6.3 \times 10^{-5}$ | $6.3 \times 10^{-5}$ |
| 10 mg/kg  | -                    | -                    | $9.4 \times 10^{-5}$ | $1.2 \times 10^{-3}$ | $2.1 \times 10^{-3}$ | 0.024                |
| 5 mg/kg   | -                    | -                    | -                    | ns                   | ns                   | ns                   |
| 2.5 mg/kg | -                    | -                    | -                    | -                    | ns                   | ns                   |
| 0.5 mg/kg | -                    | -                    | -                    | -                    | -                    | ns                   |

c. Dependence of single dose RTD-1 efficacy on time of administration.

|             | RTD-1<br>T=0 h       | RTD-1<br>T=1 h       | RTD-1<br>T=3 h       | RTD-1<br>T=6 h       |
|-------------|----------------------|----------------------|----------------------|----------------------|
| Saline      | $3.3 \times 10^{-7}$ | $2.7 \times 10^{-3}$ | $1.5 \times 10^{-4}$ | $1.7 \times 10^{-3}$ |
| RTD-1 T=0 h | -                    | $4.3 \times 10^{-3}$ | $2.5 \times 10^{-4}$ | $7.0 \times 10^{-3}$ |
| RTD-1 T=1 h | -                    | -                    | ns                   | ns                   |
| RTD-1 T=3 h | -                    | -                    | -                    | ns                   |

d. Daily RTD-1 treatment beginning 24 h after infection promotes survival.

|        | RTD-1                | Caspo                | Fluco                |
|--------|----------------------|----------------------|----------------------|
| Saline | $3.4 \times 10^{-6}$ | $3.4 \times 10^{-6}$ | $3.4 \times 10^{-6}$ |
| RTD-1  | -                    | ns                   | ns                   |
| Caspo  | -                    | -                    | $4.7 \times 10^{-3}$ |

**Supplementary Table 2. Parameter estimates for the final pharmacokinetic model for RTD-1**

| Model parameter        | Final model |          |
|------------------------|-------------|----------|
|                        | Mean        | SE (CV%) |
| CLt (mL/h)             | 14.17       | 7.179    |
| Vc (mL)                | 14.58       | 13.19    |
| CLd (mL/h)             | 3.248       | 18.22    |
| Vp (mL)                | 24.88       | 19.02    |
| K10 (h <sup>-1</sup> ) | 0.9719      | 8.379    |
| λ1 (h <sup>-1</sup> )  | 1.221       | 8.829    |
| λ2 (h <sup>-1</sup> )  | 0.1039      | 13.20    |
| T1/2-λ1 (h)            | 0.5676      | 8.829    |
| T1/2-λ2 (h)            | 6.672       | 13.20    |
| F                      | 0.6344      |          |

CLt, total clearance; Vc, central volume of distribution; Ka, absorption rate constant; CLd, distributional clearance; Vp, peripheral volume; K10, elimination rate constant from the central compartment; λ1, distribution rate constant, λ2, terminal rate constant; T1/2-λ1, distribution half-life; T1/2-λ2, terminal half-life; F, bioavailability.
